# Supplementary material
Source: Springer Nature journal article supplement (https://www.springermedizin.de/resource/supplementary/13045_2011_171_MOESM13_ESM.pdf/9660806)

**a.**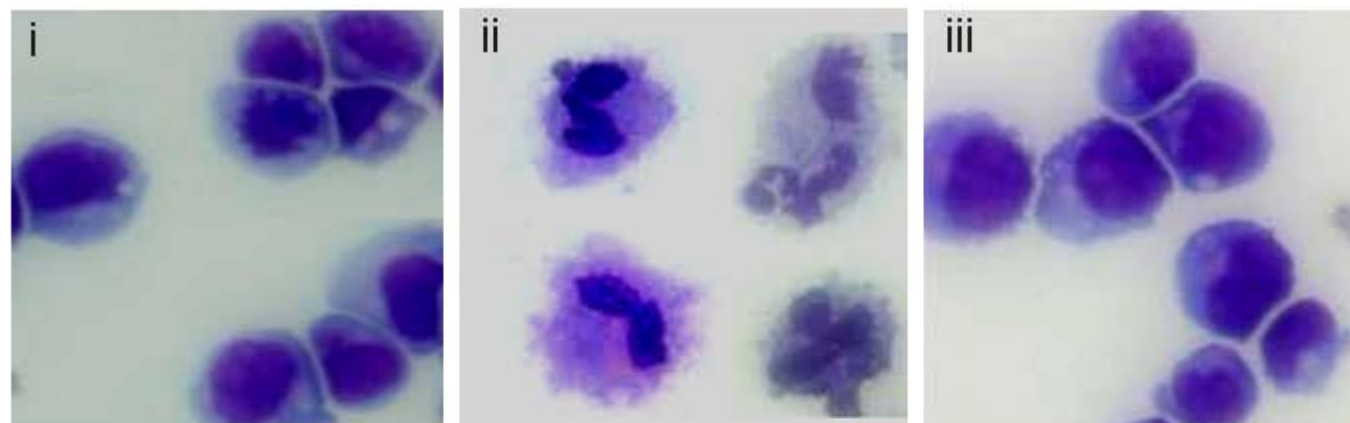**b.**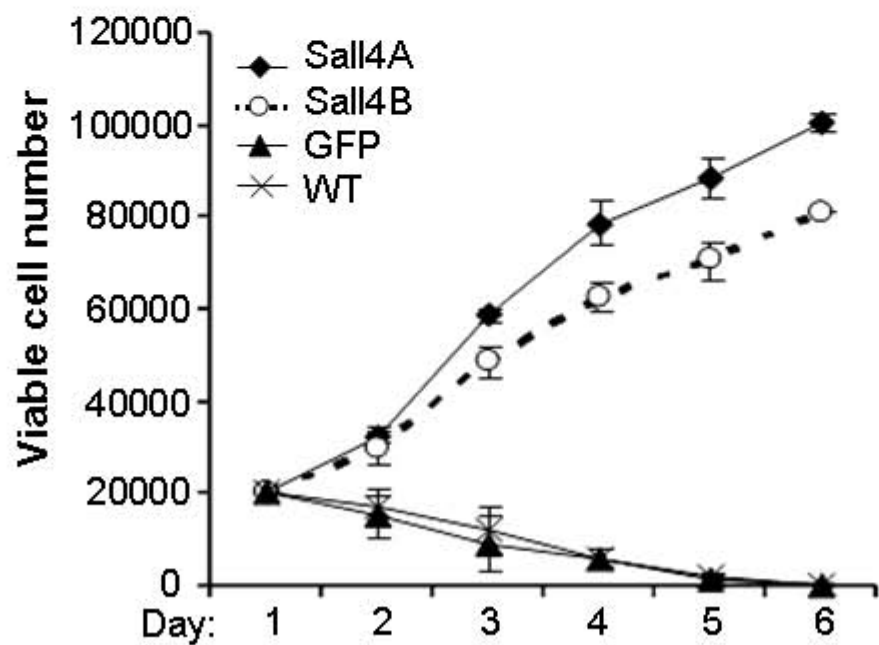

Supplement: MOESM13 [file 9660806]
